# Supplementary material for: The Tissue-Associated Microbiota in Colorectal Cancer: A Systematic Review
Source: MDPI journal article supplement (doi:10.3390/cancers14143385), 2022-07-12
Supplement: s1 [file s1]

# SUPPLEMENTARY TABLES

*Systematic Review*

## The tissue-associated microbiota in colorectal cancer: a systematic review

Carolina P. Costa 1,2,3,†, Patrícia Vieira 1,2,3,†, Melissa Mendes-Rocha 1,2,3, Joana Pereira-Marques 1,2, Rui M. Ferreira 1,2 and Ceu Figueiredo 1,2,3,\*

1 Instituto de Investigação e Inovação em Saúde, Universidade do Porto (i3S), Porto, Portugal;

2 Institute of Molecular Pathology and Immunology of the University of Porto (IPATIMUP), Porto, Portugal;

3 Department of Pathology, Faculty of Medicine of the University of Porto, Porto, Portugal.

† These authors contributed equally to this work.

\* Correspondence: cfigueiredo@ipatimup.pt

**Supplementary Table S1.** Microbiome methodological analysis of included studies of the mucosal microbiota of CRC patients and healthy controls.

**Supplementary Table S2.** Microbiome methodological analysis of included studies of CRC and non-cancerous mucosal tissues.

**Supplementary Table S3.** Quality of included CRC vs HC studies based on the Newcastle-Ottawa quality assessment scale.

**Supplementary Table S4.** Quality of included CRC vs NCT studies based on the Newcastle-Ottawa quality assessment scale.

**Supplementary Table S5.** Summary of the statistically significant microbial taxa identified in studies comparing CRC vs HC and CRC vs NCT.

**Supplementary Table S6.** Qualitative synthesis showing the strong and the suggestive microbial taxonomic associations with CRC.

Note: Reference numbers can be found in the reference list of the main manuscript.

**Supplementary Table S1. Microbiome methodological analysis of included studies of the mucosal microbiota of CRC patients and healthy controls.**

| First author, year      | 16S rRNA gene target region | Sequencing platform | Database for taxonomy assignment (version)                  | Statistical analysis for taxonomic differences |
|-------------------------|-----------------------------|---------------------|-------------------------------------------------------------|------------------------------------------------|
| Geng, 2014 [33]         | V1-V2                       | 454 GS FLX (Roche)  | NR                                                          | Univariate analysis: ANOVA and Kruskal-Wallis  |
| Gao, 2015 [58]          | V3                          | 454 GS FLX (Roche)  | RDP (11.1), SILVA (115), Greengenes (13.5)                  | LEfSe analysis                                 |
| Mira-Pascual, 2015 [34] | V1-V3                       | 454 GS FLX (Roche)  | RDP (NR)                                                    | NR                                             |
| Nakatsu, 2015 [59]      | V1-V4                       | 454 GS FLX (Roche)  | Greengenes (13.8)                                           | LEfSe analysis and Mann-Whitney U-test         |
| Thomas, 2016 [35]       | V4-V5                       | Ion Torrent PGM     | NR                                                          | Wilcoxon rank sum test                         |
| Flemer, 2017 [57]       | V3-V4                       | Illumina MiSeq      | RDP (14)                                                    | Student t-test and Wilcoxon rank sum test      |
| Richard, 2018 [60]      | V3-V4                       | Illumina MiSeq      | Greengenes (NR)                                             | LEfSe analysis and One-way ANOVA               |
| Zhang, 2019 [36]        | V6                          | Illumina MiSeq      | Greengenes (13.5)                                           | LEfSe analysis and Mann-Whitney U-test         |
| Wang Y, 2020 [61]       | V3-V4                       | Illumina MiSeq      | NR                                                          | Kruskal-Wallis test                            |
| Nardelli, 2021 [65]     | V3-V6                       | Illumina MiSeq      | 16S-UDb (NR)                                                | DESeq2                                         |
| Osman, 2021 [68]        | V3-V4                       | Illumina MiSeq      | Greengenes (13.5) and One Codex Targeted Loci database (NR) | LEfSe analysis and Mann-Whitney U-test         |
| Wang, 2021 [69]         | NR                          | Illumina MiSeq      | SILVA (132)                                                 | Benjamini-Hochberg false discovery rate        |

Abbreviations: CRC: colorectal cancer; LEfSe: Linear discriminant analysis Effect Size; NR: not reported; RDP – Ribosomal Database Project; 16S-UDb – unified 16S rRNA database.

**Supplementary Table S2. Microbiome methodological analysis of included studies of CRC and non-cancerous mucosal tissues.**

| First author, year     | 16S rRNA gene target region | Sequencing platform | Database for taxonomy assignment (version) | Statistical analysis for taxonomic differences |
|------------------------|-----------------------------|---------------------|--------------------------------------------|------------------------------------------------|
| Marchesi, 2011 [19]    | V1-V3                       | 454 GS FLX (Roche)  | RDP (NR)                                   | NR                                             |
| Chen, 2012 [40]        | V1-V3                       | 454 GS FLX (Roche)  | SILVA (106)                                | LEfSe analysis                                 |
| Geng, 2013 [45]        | V1-V2                       | 454 GS FLX (Roche)  | BLAST (NR)                                 | Mann-Whitney U-test and Student t-test         |
| Zeller, 2014 [56]      | V4                          | Illumina MiSeq      | SILVA (115)                                | Wilcoxon signed rank test                      |
| Allali, 2015 [37]      | V1-V2                       | 454 GS FLX (Roche)  | Greengenes (NR)                            | Wilcoxon signed rank test                      |
| Burns, 2015 [39]       | V5-V6                       | Illumina MiSeq      | Greengenes (NR)                            | Wilcoxon signed rank test                      |
| Gao, 2015 [58]         | V3                          | 454 GS FLX (Roche)  | RDP (11.1), SILVA (115), Greengenes (13.5) | NR                                             |
| Nakatsu, 2015 [59]     | V1-V4                       | 454 GS FLX (Roche)  | Greengenes (13.8)                          | LEfSe analysis and Mann-Whitney U-test         |
| Brim, 2017 [38]        | V1-V3                       | 454 GS FLX (Roche)  | NR                                         | NR                                             |
| Drewes, 2017 [43]      | V3-V4                       | Illumina MiSeq      | Greengenes (13.05)                         | Hedge's g difference statistic                 |
| Flemer, 2017 [57]      | V3-V4                       | Illumina MiSeq      | RDP (14)                                   | Student t-test and Wilcoxon signed rank test   |
| Gao, 2017 [44]         | V4                          | Illumina MiSeq      | NR                                         | LEfSe analysis                                 |
| Kinross, 2017 [47]     | V1-V3                       | 454 GS FLX (Roche)  | NR                                         | NR                                             |
| Cremonesi, 2018 [41]   | V4                          | Illumina MiSeq      | SILVA (128)                                | Wilcoxon signed rank test                      |
| Hale, 2018 [46]        | V3-V5                       | Illumina MiSeq      | NR                                         | Kruskal-Wallis test                            |
| Loke, 2018 [50]        | V3-V4                       | Illumina MiSeq      | NCBI 16S microbial database (NR)           | Wilcoxon signed rank test                      |
| Richard, 2018 [60]     | V3-V4                       | Illumina MiSeq      | Greengenes (NR)                            | LEfSe analysis and One-way ANOVA               |
| de Carvalho, 2019 [42] | V4                          | Ion Torrent PGM     | Greengenes (13.8)                          | DESeq2                                         |

|                             |       |                     |                                  |                                                                                        |
|-----------------------------|-------|---------------------|----------------------------------|----------------------------------------------------------------------------------------|
| <b>Leung, 2019 [48]</b>     | V3-V4 | Illumina HiSeq      | NR                               | Wilcoxon signed rank test, Mann-Whitney U-test, Kruskal-Wallis test and LEfSe analysis |
| <b>Liu, 2019 [49]</b>       | V3-V4 | Illumina MiSeq      | SILVA (123)                      | NR                                                                                     |
| <b>Saffarian, 2019 [52]</b> | V3-V4 | Illumina MiSeq      | Greengenes (13.8) and HITdb (NR) | Kruskal-Wallis test and Zero-inflated Gaussian mixture model                           |
| <b>Pan, 2020 [51]</b>       | V4    | Illumina MiSeq      | SILVA (NR)                       | LEfSe analysis                                                                         |
| <b>Sheng, 2020 [53]</b>     | V3-V4 | Illumina MiSeq      | NR                               | Mann-Whitney U-test                                                                    |
| <b>Wang Q, 2020 [54]</b>    | V3-V4 | Ion Torrent S5TM XL | SILVA (123)                      | Paired zero-inflated Gaussian mixture model                                            |
| <b>Wang Y, 2020 [61]</b>    | V3-V4 | Illumina MiSeq      | NR                               | Kruskal-Wallis test                                                                    |
| <b>Wirth, 2020 [55]</b>     | V3-V4 | Illumina MiSeq      | SILVA (132)                      | Wilcoxon rank sum test and Friedman two-way analysis of variance                       |
| <b>Choi, 2021 [62]</b>      | V3-V4 | Illumina MiSeq      | Greengenes (13.8)                | LEfSe analysis and Student t-test                                                      |
| <b>Liu, 2021 [63]</b>       | V4    | NR                  | Greengenes (NR)                  | MaAsLin analysis                                                                       |
| <b>Malik, 2021 [64]</b>     | V3-V4 | Illumina MiSeq      | SILVA (115)                      | Linear mixed models and Student t-test                                                 |
| <b>Nardelli, 2021 [65]</b>  | V3-V6 | Illumina MiSeq      | 16S-UDb (NR)                     | DESeq2                                                                                 |
| <b>Niccolai, 2021 [66]</b>  | V3-V4 | Illumina MiSeq      | NR                               | DESeq2                                                                                 |
| <b>Okuda, 2021 [67]</b>     | NR    | Illumina MiSeq      | NR                               | Wilcoxon rank sum test                                                                 |
| <b>Zhang, 2021 [70]</b>     | V4    | NR                  | Greengenes (NR)                  | Wilcoxon signed rank test with false discovery rate                                    |

Abbreviations: HITdb: human intestinal 16S rRNA gene taxonomic database; LEfSe: Linear discriminant analysis effect size; MaAsLin: Microbiome multivariable association with linear models; NR: not reported; RDP: Ribosomal Database Project; 16S-UDb – unified 16S rRNA database.

Supplementary Table S3. Quality of included CRC vs HC studies based on the Newcastle-Ottawa quality assessment scale.

| First author, year      | Selection | Comparability | Outcome | Total (out of 9) |
|-------------------------|-----------|---------------|---------|------------------|
| Geng, 2014 [33]         | ★★★★      | ☆☆            | ★★★     | 5                |
| Gao, 2015 [58]          | ★★★★      | ★★            | ★★★     | 8                |
| Mira-Pascual, 2015 [34] | ★★★★      | ★★            | ☆☆☆     | 7                |
| Nakatsu, 2015 [59]      | ★★★★      | ★★            | ★★★     | 8                |
| Thomas, 2016 [35]       | ★★★★      | ★★            | ★★★     | 8                |
| Flemer, 2017 [57]       | ★★☆☆      | ★★            | ★★★     | 7                |
| Richard, 2018 [60]      | ★★★★      | ☆☆            | ★★★     | 7                |
| Zhang, 2019 [36]        | ★★☆☆      | ☆☆            | ★★☆     | 4                |
| Wang Y, 2020 [61]       | ★★☆☆      | ☆☆            | ★★★     | 3                |
| Nardelli, 2021 [65]     | ★★☆☆      | ☆☆            | ★★★     | 6                |
| Osman, 2021 [68]        | ★★★★      | ★★            | ★★☆     | 8                |
| Wang, 2021 [69]         | ★★☆☆      | ☆☆            | ☆☆☆     | 3                |

Abbreviations: CRC: colorectal cancer; HC: healthy controls.

Supplementary Table S4. Quality of included CRC vs NCT studies based on the Newcastle-Ottawa quality assessment scale.

| First author, year     | Selection | Comparability | Outcome | Total (out of 9) |
|------------------------|-----------|---------------|---------|------------------|
| Marchesi, 2011 [19]    | ★★★★      | ★★            | ☆☆☆     | 6                |
| Chen, 2012 [40]        | ★★★★      | ★★            | ★★★     | 8                |
| Geng, 2013 [45]        | ★★★★      | ★★            | ☆☆☆     | 6                |
| Zeller, 2014 [56]      | ★★★★      | ★★            | ☆☆★     | 7                |
| Allali, 2015 [37]      | ★★★★      | ★★            | ☆☆★     | 7                |
| Burns, 2015 [39]       | ★★★★      | ★★            | ☆☆★     | 7                |
| Gao, 2015 [58]         | ★★★★      | ★★            | ★★☆     | 7                |
| Nakatsu, 2015 [59]     | ★★★★      | ★★            | ☆☆★     | 8                |
| Brim, 2017 [38]        | ★★★★      | ★★            | ☆☆☆     | 6                |
| Drewes, 2017 [43]      | ★★★★      | ★★            | ☆☆★     | 7                |
| Flemer, 2017 [57]      | ★★★★      | ★★            | ★★★     | 8                |
| Gao, 2017 [44]         | ★★★★      | ★★            | ★★☆     | 7                |
| Kinross, 2017 [47]     | ★★★★      | ★★            | ★★☆     | 7                |
| Cremonesi, 2018 [41]   | ★★★★      | ★★            | ☆☆☆     | 6                |
| Hale, 2018 [46]        | ★★★★      | ★★            | ☆☆☆     | 7                |
| Loke, 2018 [50]        | ★★★★      | ★★            | ☆☆★     | 8                |
| Richard, 2018 [60]     | ★★★★      | ★★            | ★★★     | 8                |
| de Carvalho, 2019 [42] | ★★★★      | ★★            | ☆☆☆     | 7                |
| Leung, 2019 [48]       | ★★★★      | ★★            | ☆☆★     | 8                |
| Liu, 2019 [49]         | ★★★★      | ★★            | ☆☆☆     | 6                |
| Saffarian, 2019 [52]   | ★★★★      | ★★            | ★★☆     | 7                |
| Pan, 2020 [51]         | ★★★★      | ★★            | ★★★     | 8                |
| Sheng, 2020 [53]       | ★★★★      | ★★            | ★★☆     | 8                |
| Wang Q, 2020 [54]      | ★★★★      | ★★            | ★★★     | 8                |
| Wang Y, 2020 [61]      | ★★★★      | ★★            | ☆☆★     | 7                |
| Wirth, 2020 [55]       | ★★★★      | ★★            | ☆☆★     | 7                |
| Choi, 2021 [62]        | ★★★★      | ★★            | ☆☆★     | 7                |
| Liu, 2021 [63]         | ★★★★      | ★★            | ☆☆★     | 7                |
| Malik, 2021 [64]       | ★★★★      | ★★            | ★★★     | 9                |
| Nardelli, 2021 [65]    | ★★★★      | ★★            | ★★★     | 8                |
| Niccolai, 2021 [66]    | ★★★★      | ★★            | ★★★     | 8                |
| Okuda, 2021 [67]       | ★★★★      | ★★            | ☆☆★     | 7                |
| Zhang, 2021 [70]       | ★★★★      | ★★            | ★★☆     | 8                |

Abbreviations: CRC: colorectal cancer; NCT: non-cancerous tissue.

**Supplementary Table S5. Summary of the statistically significant microbial taxa identified in studies comparing CRC vs HC and CRC vs NCT.**

|               | Microbial taxa               | CRC vs HC       |                  | CRC vs NCT         |                             |
|---------------|------------------------------|-----------------|------------------|--------------------|-----------------------------|
|               |                              | Increased in HC | Increased in CRC | Increased in NCT   | Increased in CRC            |
| <b>Phylum</b> | Acidobacteria                | -               | -                | 1 [70]             | 0                           |
|               | AC1                          | -               | -                | 1 [70]             | 0                           |
|               | Actinobacteria               | 2 [35,65]       | 0                | 4 [44,55,62,70]    | 0                           |
|               | Armatimonadetes              | -               | -                | 1 [70]             | 0                           |
|               | Bacteroidetes                | 2 [59,60]       | 2 [35,57]        | 5 [39,41,60,62,64] | 0                           |
|               | Chlorobi                     | -               | -                | 1 [70]             | 0                           |
|               | Chloroflexi                  | -               | -                | 1 [70]             | 0                           |
|               | Cyanobacteria                | 1 [35]          | 0                | 2 [64,70]          | 0                           |
|               | Deferribacteres              | -               | -                | 1 [70]             | 0                           |
|               | Elusimicrobia                | -               | -                | 1 [70]             | 0                           |
|               | WPS-2 (Eremiobacterota)      | -               | -                | 1 [70]             | 0                           |
|               | Fibrobacteres                | -               | -                | 1 [70]             | 0                           |
|               | Firmicutes                   | 0               | 1 [58]           | 5 [39,41,44,62]    | 1 [58]                      |
|               | Fusobacteria                 | 0               | 4 [58,60,65,68]  | 0                  | 8 [37,39,41,44,48,62,66,70] |
|               | Gemmatimonadetes             | -               | -                | 1 [70]             | 0                           |
|               | GN02 (Gracilibacteria)       | -               | -                | 1 [70]             | 0                           |
|               | GOUTA4                       | -               | -                | 1 [70]             | 0                           |
|               | Nitrospirae                  | -               | -                | 1 [70]             | 0                           |
|               | OD1 (Parcubacteria)          | 0               | 1 [35]           | 1 [70]             | 0                           |
|               | OP3 (Omnitrophica)           | -               | -                | 1 [70]             | 0                           |
|               | Planctomycetes               | 1 [35]          | 0                | 1 [70]             | 0                           |
|               | Proteobacteria               | 2 [35,58]       | 1 [60]           | 1 [58]             | 3 [39,54,66]                |
|               | TM7 (Saccharibacteria)       | -               | -                | 1 [70]             | 0                           |
|               | SR1                          | -               | -                | 1 [70]             | 0                           |
|               | BRC1 (Sumerlaeota)           | -               | -                | 1 [70]             | 0                           |
|               | Synergitetes                 | 0               | 1 [68]           | 0                  | 1 [70]                      |
|               | Verrucomicrobia              | 0               | 1 [68]           | 1 [70]             | 0                           |
|               | WS4                          | -               | -                | 1 [70]             | 0                           |
| <b>Class</b>  | <i>Alphaproteobacteria</i>   | 0               | 2 [36,68]        | 0                  | 1 [40]                      |
|               | <i>Bacilli</i>               | -               | -                | 0                  | 2 [40,60]                   |
|               | <i>Bacteroidia</i>           | -               | -                | 2 [60,62]          | 0                           |
|               | <i>Betaproteobacteria</i>    | 1 [68]          | 0                | 1 [62]             | 0                           |
|               | <i>Deltaproteobacteria</i>   | 1 [36]          | 0                | -                  | -                           |
|               | <i>Epsilonproteobacteria</i> | 0               | 1 [68]           | 0                  | 1 [62]                      |
|               | <i>Erysipelotrichi</i>       | -               | -                | 0                  | 1 [60]                      |
|               | <i>Fusobacteriia</i>         | -               | -                | 0                  | 1 [62]                      |
|               | <i>Gammaproteobacteria</i>   | 1 [35]          | 0                | -                  | -                           |
|               | <i>Spirochaetes</i>          | -               | -                | 0                  | 1 [62]                      |
|               | <i>Synergistia</i>           | 0               | 1 [68]           | -                  | -                           |
|               | ZB2                          | 0               | 1 [35]           | -                  | -                           |
| <b>Order</b>  | <i>Acidobacteriales</i>      | -               | -                | 1 [70]             | 0                           |
|               | <i>Actinomycetales</i>       | -               | -                | 1 [70]             | 0                           |
|               | <i>Bacillales</i>            | 1 [59]          | 0                | 0                  | 1 [70]                      |
|               | <i>Bacteroidales</i>         | -               | -                | 2 [60,62]          | 0                           |
|               | <i>Bifidobacteriales</i>     | -               | -                | 2 [62,70]          | 0                           |
|               | <i>Burkholderiales</i>       | 1 [68]          | 0                | 2 [62,70]          | 0                           |

|               |                            |        |           |              |              |
|---------------|----------------------------|--------|-----------|--------------|--------------|
|               | <i>Campylobacteriales</i>  | -      | -         | 0            | 2 [62,70]    |
|               | <i>Clostridiales</i>       | 0      | 2 [35,57] | 2 [62,64]    | -            |
|               | <i>Coriobacteriia</i>      | -      | -         | 1 [62]       | 0            |
|               | <i>Desulfovibrionales</i>  | 1 [36] | 0         | -            | -            |
|               | <i>Erysipelotrichales</i>  | -      | -         | 1 [70]       | 1 [60]       |
|               | <i>Flavobacteriales</i>    | -      | -         | 1 [70]       | 0            |
|               | <i>Fusobacteriales</i>     | 0      | 1 [68]    | 0            | 2 [62,70]    |
|               | <i>GCA004</i>              | -      | -         | 0            | 1 [70]       |
|               | <i>Gemellales</i>          | -      | -         | 0            | 1 [70]       |
|               | <i>Gemmatimonadales</i>    | -      | -         | 1 [70]       | 0            |
|               | <i>Lactobacillales</i>     | -      | -         | 0            | 1 [60]       |
|               | <i>Mycoplasmatales</i>     | -      | -         | 0            | 1 [70]       |
|               | <i>Myxococcales</i>        | -      | -         | 1 [70]       | 0            |
|               | <i>Phycisphaerales</i>     | 1 [35] | 0         | -            | -            |
|               | <i>Pseudomonadales</i>     | -      | -         | 1 [70]       | 0            |
|               | <i>Rhizobiales</i>         | 0      | 1 [36]    | 1 [70]       | 0            |
|               | <i>Rickettsiales</i>       | -      | -         | 1 [64]       | 0            |
|               | <i>Sphingobacteriales</i>  | 1 [35] | 0         | 1 [70]       | 0            |
|               | <i>Spirochaetales</i>      | -      | -         | 0            | 1 [62]       |
|               | <i>Streptophyta</i>        | -      | -         | 1 [70]       | 0            |
|               | <i>Verrucomicrobiales</i>  | 0      | 1 [68]    | -            | -            |
|               | <i>Xanthomonadales</i>     | -      | -         | 0            | 1 [70]       |
| <b>Family</b> | <i>0319-6A21</i>           | -      | -         | 0            | 1 [63]       |
|               | <i>Alcaligenaceae</i>      | 1 [68] | 0         | 1 [62]       | 0            |
|               | <i>Bifidobacteriaceae</i>  | -      | -         | 2 [62,70]    | 0            |
|               | <i>Bradyrhizobiaceae</i>   | 1 [35] | 0         | 1 [70]       | 0            |
|               | <i>Campylobacteriaceae</i> | 0      | 1 [68]    | 0            | 2 [62,70]    |
|               | <i>Carnobacteriaceae</i>   | -      | -         | 0            | 1 [64]       |
|               | <i>Caulobacteraceae</i>    | 1 [35] | 0         | -            | -            |
|               | <i>Chitinophagaceae</i>    | 1 [35] | 0         | 1 [70]       | 0            |
|               | <i>Christensenellaceae</i> | 0      | 1 [68]    | -            | -            |
|               | <i>Clostridiaceae</i>      | 1 [36] | 0         | -            | -            |
|               | <i>Comamonadaceae</i>      | -      | -         | 1 [70]       | 0            |
|               | <i>Coriobacteriaceae</i>   | -      | -         | 2 [62,64]    | 1 [37]       |
|               | <i>Desulfovibrionaceae</i> | 1 [36] | 0         | -            | -            |
|               | <i>Enterobacteriaceae</i>  | -      | -         | 0            | 1 [42]       |
|               | <i>Erysipelotrichaceae</i> | -      | -         | 2 [62,70]    | 1 [60]       |
|               | <i>Flavobacteriaceae</i>   | 1 [35] | 0         | 1 [70]       | 0            |
|               | <i>Fusobacteriaceae</i>    | 0      | 1 [68]    | 0            | 3 [42,62,70] |
|               | <i>Gemellaceae</i>         | -      | -         | 0            | 2 [67,70]    |
|               | <i>Halomonadaceae</i>      | -      | -         | 0            | 1 [54]       |
|               | <i>Hyphomicrobiaceae</i>   | 0      | 1 [36]    | -            | -            |
|               | <i>Intrasporangiaceae</i>  | 1 [61] | 0         | 1 [61]       | 1 [70]       |
|               | <i>Koribacteraceae</i>     | -      | -         | 1 [70]       | 0            |
|               | <i>Lachnospiraceae</i>     | 0      | 1 [35]    | 3 [39,62,64] | 1 [37]       |
|               | <i>Listeriaceae</i>        | -      | -         | 1 [70]       | 0            |
|               | <i>Micrococcaceae</i>      | -      | -         | 0            | 1 [70]       |
|               | <i>Mogibacteriaceae</i>    | 0      | 1 [35]    | -            | -            |
|               | <i>Moraxellaceae</i>       | -      | -         | 1 [70]       | 0            |
|               | <i>Mycoplasmataceae</i>    | -      | -         | 0            | 1 [70]       |
|               | <i>Muribaculaceae</i>      | -      | -         | 2 [64,70]    | 0            |



|              |                                  |              |           |                          |           |
|--------------|----------------------------------|--------------|-----------|--------------------------|-----------|
|              | <i>Neisseriaceae</i>             | -            | -         | 0                        | 1 [37]    |
|              | <i>Nocardiodaceae</i>            | -            | -         | 0                        | 1 [70]    |
|              | <i>Odoribacteraceae</i>          | 0            | 1 [35]    | 1 [62]                   | 0         |
|              | <i>Oxalobacteraceae</i>          | -            | -         | 1 [62]                   | 0         |
|              | <i>Paenibacillaceae</i>          | 0            | 1 [36]    | -                        | -         |
|              | <i>Peptostreptococcaceae</i>     | -            | -         | 0                        | 1 [63]    |
|              | <i>Phyllobacteriaceae</i>        | -            | -         | 1 [70]                   | 0         |
|              | <i>Porphyromonadaceae</i>        | 0            | 1 [57]    | 4 [37,60,62,70]          | 0         |
|              | <i>Prevotellaceae</i>            | 1 [36]       | 0         | -                        | -         |
|              | <i>Pseudomonadaceae</i>          | -            | -         | 1 [70]                   | 0         |
|              | <i>Rikenellaceae</i>             | 0            | 1 [35]    | 4 [39,46,67,70]          | 0         |
|              | <i>Ruminococcaceae</i>           | 0            | 1 [35]    | 7 [39,40,53,60,62,67,70] | 0         |
|              | <i>Shewanellaceae</i>            | -            | -         | 0                        | 1 [70]    |
|              | <i>Sinobacteraceae</i>           | -            | -         | 1 [61]                   | 0         |
|              | <i>Sphingomonadaceae</i>         | -            | -         | 1 [70]                   | 0         |
|              | <i>Spirochaetaceae</i>           | -            | -         | 0                        | 1 [62]    |
|              | <i>Streptococcaceae</i>          | 0            | 1 [33]    | 0                        | 2 [42,60] |
|              | <i>Streptomycetaceae</i>         | -            | -         | 0                        | 1 [70]    |
|              | <i>Syntrophobacteraceae</i>      | -            | -         | 0                        | 1 [63]    |
|              | <i>Tissierellaceae</i>           | 0            | 1 [68]    | -                        | -         |
|              | <i>Verrucomicrobiaceae</i>       | 0            | 1 [68]    | -                        | -         |
|              | <i>Xanthomonadaceae</i>          | 1 [35]       | 0         | 0                        | 1 [70]    |
| <b>Genus</b> | <i>Acetanaerobacterium</i>       | 0            | 1 [57]    | -                        | -         |
|              | <i>Achromobacter</i>             | 1 [35]       | 0         | -                        | -         |
|              | <i>Acidocella</i>                | -            | -         | 1 [40]                   | 0         |
|              | <i>Acidovorax</i>                | 1 [58]       | 0         | -                        | -         |
|              | <i>Acinetobacter</i>             | 2 [35,58]    | 0         | 3 [44,52,70]             | 0         |
|              | <i>Actinomyces</i>               | 0            | 1 [57]    | 1 [50]                   | 0         |
|              | <i>Aeromonas</i>                 | -            | -         | 0                        | 1 [42]    |
|              | <i>Aggregatibacter</i>           | 0            | 1 [59]    | -                        | -         |
|              | <i>Agrobacterium</i>             | 1 [35]       | 0         | -                        | -         |
|              | <i>Akkermansia</i>               | 0            | 1 [68]    | 3 [53,64,67]             | 0         |
|              | <i>Alistipes</i>                 | 0            | 1 [57]    | 1 [50]                   | 0         |
|              | <i>Allisonella</i>               | 0            | 1 [57]    | -                        | -         |
|              | <i>Allobaculum</i>               | -            | -         | 1 [64]                   | 0         |
|              | <i>Alloprevotella</i>            | -            | -         | 0                        | 1 [44]    |
|              | <i>Anaerococcus</i>              | 1 [35]       | 0         | 0                        | 1 [61]    |
|              | <i>Anaerofustis</i>              | 1 [68]       | 0         | -                        | -         |
|              | <i>Anaeroplasma</i>              | -            | -         | 1 [64]                   | 0         |
|              | <i>Anaerorhabdus</i>             | 1 [57]       | 0         | -                        | -         |
|              | <i>Anaerostipes</i>              | 1 [57]       | 1 [35]    | -                        | -         |
|              | <i>Anaerotruncus</i>             | 0            | 1 [35]    | 1 [50]                   | 0         |
|              | <i>Anoxybacillus</i>             | -            | -         | 1 [45]                   | 0         |
|              | <i>Arthrobacter</i>              | -            | -         | 0                        | 1 [70]    |
|              | <i>Bacillus</i>                  | 1 [35]       | 0         | 3 [40,44,61]             | 0         |
|              | <i>Bacteroides</i>               | 1 [59]       | 2 [35,57] | 5 [39,42,46,50,67]       | 1 [58]    |
|              | <i>Bacteroidetes_VC2_I_Bac22</i> | 1 [35]       | 0         | -                        | -         |
|              | <i>Bifidobacterium</i>           | 0            | 1 [57]    | 3 [50,62,70]             | 0         |
|              | <i>Bilophila</i>                 | 0            | 1 [35]    | -                        | -         |
|              | <i>Blautia</i>                   | 3 [57,59,68] | 0         | 4 [37,46,59,60]          | 0         |
|              | <i>Bosea</i>                     | 1 [35]       | 0         | -                        | -         |

|                                  |           |                    |                    |                                                   |
|----------------------------------|-----------|--------------------|--------------------|---------------------------------------------------|
| <i>Bradyrhizobium</i>            | -         | -                  | 2 [61,70]          | 0                                                 |
| <i>Brevibacterium</i>            | 1 [35]    | 0                  | -                  | -                                                 |
| <i>Brevundimonas</i>             | 2 [35,58] | 0                  | 1 [48]             | 0                                                 |
| <i>Brochothrix</i>               | -         | -                  | 1 [70]             | 0                                                 |
| <i>Bulleidia</i>                 | 0         | 1 [68]             | 0                  | 1 [37]                                            |
| <i>Burkholderia</i>              | -         | -                  | 0                  | 1 [63]                                            |
| <i>Butyricimonas</i>             | 0         | 1 [35]             | 1 [67]             | 1 [37]                                            |
| <i>Butyricoccus</i>              | 0         | 1 [35]             | -                  | -                                                 |
| <i>Buttiauxella</i>              | 1 [58]    | 0                  | -                  | -                                                 |
| <i>Campylobacter</i>             | 0         | 4 [57,59,61,68]    | 0                  | 9<br>[37,42,44,48,61,62,64,67,70]                 |
| <i>Candidatus</i>                | -         | -                  | 0                  | 1 [39]                                            |
| <i>Catenibacterium</i>           | -         | -                  | 0                  | 1 [64]                                            |
| <i>Catonella</i>                 | -         | -                  | 0                  | 1 [70]                                            |
| <i>Caulobacter</i>               | 1 [58]    | 0                  | -                  | -                                                 |
| <i>Cetobacterium</i>             | -         | -                  | 0                  | 1 [42]                                            |
| <i>Cheryseobacterium</i>         | 0         | 1 [36]             | -                  | -                                                 |
| <i>Chitinophaga</i>              | 1 [35]    | 0                  | -                  | -                                                 |
| <i>Citrobacter</i>               | -         | -                  | 0                  | 1 [64]                                            |
| <i>02d06</i>                     | 1 [36]    | 0                  | -                  | -                                                 |
| <i>Clostridium</i>               | 0         | 1 [35]             | 2 [67,70]          | 1 [42]                                            |
| <i>Clostridium cluster IV</i>    | 0         | 1 [57]             | -                  | -                                                 |
| <i>Clostridium cluster XIVa</i>  | 1 [57]    | 0                  | 0                  | 0                                                 |
| <i>Clostridium cluster XVIII</i> | 1 [57]    | 0                  | -                  | -                                                 |
| <i>Christensenella</i>           | -         | -                  | 1 [50]             | 0                                                 |
| <i>Collinsella</i>               | -         | -                  | 3 [50,62,67]       | 0                                                 |
| <i>Coprococcus</i>               | 1 [57]    | 0                  | -                  | -                                                 |
| <i>Corynebacterium</i>           | 1 [35]    | 0                  | -                  | -                                                 |
| <i>Cryocola</i>                  | 1 [35]    | 0                  | -                  | -                                                 |
| <i>Cupriavidus</i>               | 1 [35]    | 0                  | -                  | -                                                 |
| <i>Delftia</i>                   | 1 [35]    | 0                  | -                  | -                                                 |
| <i>Dehalobacterium</i>           | 0         | 2 [35,68]          | -                  | -                                                 |
| <i>Desulfovibrio</i>             | 0         | 1 [35]             | 1 [50]             | 0                                                 |
| <i>Dethiosulfatibacter</i>       | 0         | 1 [61]             | -                  | -                                                 |
| <i>Devosia</i>                   | 1 [35]    | 1 [36]             | -                  | -                                                 |
| <i>Dialister</i>                 | 0         | 1 [68]             | 1 [50]             | 2 [44,64]                                         |
| <i>Dorea</i>                     | 2 [57,68] | 1 [35]             | 1 [62]             | 0                                                 |
| <i>Eggerthella</i>               | 0         | 1 [35]             | -                  | -                                                 |
| <i>Eikenella</i>                 | 0         | 1 [61]             | 0                  | 2 [37,67]                                         |
| <i>Enterococcus</i>              | 0         | 1 [57]             | 1 [54]             | 2 [63,67]                                         |
| <i>Epilithonimonas</i>           | 1 [58]    | 0                  | -                  | -                                                 |
| <i>Escherichia</i>               | 1 [35]    | 0                  | -                  | -                                                 |
| <i>Escherichia-Shigella</i>      | 0         | 2 [57,58]          | -                  | -                                                 |
| <i>Eubacterium</i>               | 2 [36,68] | 1 [57]             | 1 [62]             | 1 [52]                                            |
| <i>Faecalibacterium</i>          | 2 [57,68] | 0                  | 5 [37,40,53,60,62] | 0                                                 |
| <i>Filifactor</i>                | 0         | 1 [68]             | -                  | -                                                 |
| <i>Flavobacterium</i>            | 1 [58]    | 0                  | -                  | -                                                 |
| <i>Fretibacterium</i>            | -         | -                  | 0                  | 1 [54]                                            |
| <i>Fusobacterium</i>             | 0         | 6 [35,57-59,61,68] | 0                  | 19 [37,39,42,44,46-48,52-54,58,59,61-64,66,67,70] |
| <i>Gemella</i>                   | 0         | 1 [59]             | 0                  | 3 [37,44,59]                                      |
| <i>Gemmiger</i>                  | 1 [57]    | 0                  | -                  | -                                                 |

|                            |              |                 |                                   |                             |
|----------------------------|--------------|-----------------|-----------------------------------|-----------------------------|
| <i>Geobacillus</i>         | -            | -               | 1 [44]                            | 0                           |
| <i>Gordonia</i>            | 1 [35]       | 0               | -                                 | -                           |
| <i>Granulicatella</i>      | 0            | 3 [57,59,61]    | 0                                 | 3 [37,44,59]                |
| <i>Halomonas</i>           | -            | -               | 0                                 | 1 [54]                      |
| <i>Holdemania</i>          | 1 [57]       | 1 [35]          | -                                 | -                           |
| <i>Howardella</i>          | 0            | 1 [57]          | -                                 | -                           |
| <i>Hungatella</i>          | -            | -               | 0                                 | 1 [44]                      |
| <i>Intestinimonas</i>      | -            | -               | 1 [50]                            | 0                           |
| <i>Janthinobacterium</i>   | 1 [58]       | 0               | -                                 | -                           |
| <i>Kaistobacter</i>        | -            | -               | 1 [70]                            | 0                           |
| <i>Klebsiella</i>          | 3 [35,36,57] | 0               | 0                                 | 1 [54]                      |
| <i>Lachnoanaerobaculum</i> | -            | -               | 0                                 | 2 [44,70]                   |
| <i>Lachnobacterium</i>     | 0            | 1 [68]          | -                                 | -                           |
| <i>Lachnospira</i>         | 0            | 1 [35]          | 1 [37]                            | 0                           |
| <i>Lactobacillus</i>       | 1 [35]       | 0               | 1 [54]                            | 0                           |
| <i>Lactococcus</i>         | 0            | 1 [58]          | 1 [44]                            | 1 [58]                      |
| <i>Leptothrix</i>          | 1 [35]       | 0               | 0                                 | 1 [44]                      |
| <i>Leptotrichia</i>        | 1 [36]       | 2 [59,61]       | 1 [42]                            | 2 [64,67]                   |
| <i>Leuconostoc</i>         | -            | -               | 1 [44]                            | 0                           |
| <i>Marvinbryantia</i>      | -            | -               | 1 [64]                            | 0                           |
| <i>Megasphaera</i>         | -            | -               | 2 [50,63]                         | 0                           |
| <i>Massilia</i>            | -            | -               | 0                                 | 1 [52]                      |
| <i>Methylobacterium</i>    | 1 [35]       | 0               | 2 [40,61]                         | 0                           |
| <i>Mesorhizobium</i>       | 1 [35]       | 0               | -                                 | -                           |
| <i>Microbacterium</i>      | 1 [35]       | 0               | 1 [45]                            | 1 [70]                      |
| <i>Micrococcus</i>         | 1 [35]       | 0               | -                                 | -                           |
| <i>Mitsuokella</i>         | -            | -               | 1 [50]                            | 1 [67]                      |
| <i>Mogibacterium</i>       | 1[36]        | 2 [57,61]       | -                                 | -                           |
| <i>Morganella</i>          | -            | -               | 1 [50]                            | 1 [44]                      |
| <i>Mycobacterium</i>       | 1 [35]       | 0               | -                                 | -                           |
| <i>Negativibacillus</i>    | -            | -               | 1 [50]                            | 0                           |
| <i>Neisseria</i>           | 2 [35,68]    | 0               | 1 [52]                            | 0                           |
| <i>Nocardioide</i>         | -            | -               | 0                                 | 1 [70]                      |
| <i>Ochrobactrum</i>        | 1 [35]       | 0               | 1 [40]                            | 0                           |
| <i>Odoribacter</i>         | 0            | 1 [35]          | 0                                 | 1 [42]                      |
| <i>Oribacterium</i>        | -            | -               | 0                                 | 1 [70]                      |
| <i>Oscillibacter</i>       | 0            | 1 [57]          | 2 [50,52]                         | 0                           |
| <i>Oscillospira</i>        | 0            | 2 [35,59]       | -                                 | -                           |
| <i>Oxalobacter</i>         | -            | -               | 1 [62]                            | 0                           |
| <i>Paenibacillus</i>       | 0            | 1 [36]          | -                                 | -                           |
| <i>Paeniclostridium</i>    | -            | -               | 1 [54]                            | 0                           |
| <i>Pantoea</i>             | -            | -               | 1 [44]                            | 0                           |
| <i>Papillibacter</i>       | 0            | 1 [35]          | -                                 | -                           |
| <i>Parabacteroides</i>     | 0            | 1 [35]          | 9<br>[37,40,42,44,46,53,60,62,70] | 0                           |
| <i>Paracoccus</i>          | 1 [35]       | 0               | -                                 | -                           |
| <i>Paraprevotella</i>      | -            | -               | 2 [40,42]                         | 0                           |
| <i>Parascardovia</i>       | 0            | 1 [33]          | -                                 | -                           |
| <i>Parvimonas</i>          | 0            | 4 [57,59,61,68] | 0                                 | 8 [37,42,44,59,61,63,67,70] |
| <i>Pedobacter</i>          | 2 [35,58]    | 0               | -                                 | -                           |
| <i>Peptoniphilus</i>       | -            | -               | 0                                 | 1 [64]                      |
| <i>Peptococcus</i>         | -            | -               | 0                                 | 1 [70]                      |

|                |                                     |              |                 |                       |                          |
|----------------|-------------------------------------|--------------|-----------------|-----------------------|--------------------------|
|                | <i>Peptostreptococcus</i>           | 0            | 5 [57-59,61,68] | 0                     | 6 [42,44,54,59,63,67]    |
|                | <i>Phascolarctobacterium</i>        | 2 [36,68]    | 2 [35,57]       | 1 [40]                | 0                        |
|                | <i>Phenylobacterium</i>             | 1 [35]       | 0               | -                     | -                        |
|                | <i>Phyllobacterium</i>              | 1 [35]       | 0               | 1 [70]                | 0                        |
|                | <i>Porphyromonas</i>                | 0            | 2 [33,57]       | 0                     | 1 [44]                   |
|                | <i>Portiera</i>                     | -            | -               | 0                     | 1 [39]                   |
|                | <i>Prevotella</i>                   | 2 [35,36]    | 3 [57,59,68]    | 5 [42,46,50,54,67]    | 2 [44,58]                |
|                | <i>Propionibacterium</i>            | 3 [35,58,68] | 0               | 1 [44]                | 0                        |
|                | <i>Providentia</i>                  | -            | -               | 0                     | 1 [39]                   |
|                | <i>Pseudocalvibacter</i>            | 1 [35]       | 0               | -                     | -                        |
|                | <i>Pseudoflavonifractor</i>         | -            | -               | 1 [50]                | 0                        |
|                | <i>Pseudomonas</i>                  | 2 [35,58]    | 1 [57]          | 5 [42,44,50,58,70]    | 0                        |
|                | <i>Pseudoramibacter_Eubacterium</i> | 0            | 1 [35]          | -                     | -                        |
|                | <i>Pseudoxanthomonas</i>            | 1 [35]       | 0               | -                     | -                        |
|                | <i>Psychrobacter</i>                | -            | -               | 1 [70]                | 0                        |
|                | <i>Ralstonia</i>                    | 1 [35]       | 0               | -                     | -                        |
|                | <i>Rahnella</i>                     | 1 [58]       | 0               | -                     | -                        |
|                | <i>Rhodococcus</i>                  | 1 [35]       | 0               | 1 [50]                | 0                        |
|                | <i>Roseburia</i>                    | 0            | 1 [35]          | 1 [46]                | 1 [45]                   |
|                | <i>Rubrobacter</i>                  | 1 [35]       | 0               | -                     | -                        |
|                | <i>Ruminiclostridium</i>            | -            | -               | 0                     | 1 [44]                   |
|                | <i>Ruminococcus</i>                 | 1 [35]       | 1 [57]          | 6 [37,42,53,62,66,67] | 0                        |
|                | <i>Salinispora</i>                  | 0            | 1 [35]          | -                     | -                        |
|                | <i>Schwartzia</i>                   | 0            | 2 [61,68]       | 0                     | 1 [61]                   |
|                | <i>Selenomonas</i>                  | 0            | 2 [61,68]       | 0                     | 4 [44,62,67,70]          |
|                | <i>Serratia</i>                     | 1 [36]       | 0               | -                     | -                        |
|                | <i>Shewanella</i>                   | 0            | 1 [61]          | 0                     | 2 [54,70]                |
|                | <i>Sphingobacterium</i>             | 1[58]        | 0               | -                     | -                        |
|                | <i>Sphingobium</i>                  | 1 [35]       | 0               | 1 [67]                | 0                        |
|                | <i>Sphingomonas</i>                 | 2 [35,58]    | 0               | 2 [52,70]             | 0                        |
|                | <i>Staphylococcus</i>               | 1 [35]       | 2 [33,57]       | -                     | -                        |
|                | <i>Stenotrophomonas</i>             | 2 [35,58]    | 0               | 0                     | 1 [70]                   |
|                | <i>Streptococcus</i>                | 0            | 3 [33,57,61]    | 0                     | 7 [37,48,53,58,60,61,67] |
|                | <i>Streptomyces</i>                 | 1 [61]       | 0               | 1 [61]                | 0                        |
|                | <i>Streptophyla</i>                 | 0            | 1 [33]          | -                     | -                        |
|                | <i>Streptophyta</i>                 | 1 [35]       | 0               | -                     | -                        |
|                | <i>Succinivibrio</i>                | -            | -               | 1 [50]                | 0                        |
|                | <i>Sutterella</i>                   | 1 [68]       | 0               | 1 [62]                | 0                        |
|                | <i>Treponema</i>                    | -            | -               | 1 [42]                | 2 [62,67]                |
|                | <i>Turicibacter</i>                 | -            | -               | 1 [64]                | 0                        |
|                | <i>Veillonella</i>                  | 0            | 1 [33]          | 2 [54,67]             | 0                        |
|                | <i>Victivallis</i>                  | 0            | 1 [57]          | -                     | -                        |
| <b>Species</b> | <i>Acinetobacter junii</i>          | -            | -               | 0                     | 1 [52]                   |
|                | <i>Acinetobacter johnsonii</i>      | -            | -               | 1 [70]                | 0                        |
|                | <i>Aggregatibacter segnis</i>       | 0            | 1 [59]          | -                     | -                        |
|                | <i>Akkermansia muciniphila</i>      | 0            | 1 [68]          | -                     | -                        |
|                | <i>Alcaligenes faecalis</i>         | 1 [35]       | 0               | -                     | -                        |
|                | <i>Atopobium parvulum</i>           | 1 [68]       | 0               | -                     | -                        |
|                | <i>Bacillus cereus</i>              | 1 [35]       | 0               | -                     | -                        |
|                | <i>Bacteroides acidifaciens</i>     | -            | -               | 1 [70]                | 0                        |
|                | <i>Bacteroides eggerthii</i>        | -            | -               | 1 [54]                | 0                        |

|                                           |           |                 |                 |              |
|-------------------------------------------|-----------|-----------------|-----------------|--------------|
| <i>Bacteroides fragilis</i>               | 0         | 4 [35,59,65,68] | 0               | 3 [43,52,59] |
| <i>Bacteroides caccae</i>                 | -         | -               | 1 [46]          | 0            |
| <i>Bacteroides ovatus</i>                 | 0         | 1 [59]          | 1 [46]          | 0            |
| <i>Bacteroides uniformis</i>              | 0         | 1 [35]          | 4 [39,46,60,70] | 1 [52]       |
| <i>Bacteroides vulgatus</i>               | 1 [65]    | 0               | -               | -            |
| <i>Blautia producta</i>                   | 1 [36]    | 0               | -               | -            |
| <i>Blautia wexlerae</i>                   | -         | -               | 1 [52]          | 0            |
| <i>Campylobacter ureolyticus</i>          | 0         | 1 [59]          | 0               | 1 [70]       |
| <i>Catenibacterium mitsuokai</i>          | -         | -               | 0               | 1 [52]       |
| <i>Christensenella timonensis</i>         | 0         | 1 [68]          | -               | -            |
| <i>Clostridium aldenense</i>              | -         | -               | 0               | 1 [70]       |
| <i>Clostridium hathewayi</i>              | -         | -               | 0               | 1 [70]       |
| <i>Clostridium hiranonis</i>              | 1 [36]    | 0               | -               | -            |
| <i>Clostridium sensu stricto</i>          | -         | -               | 1 [44]          | 0            |
| <i>Clostridium oroticum</i>               | 1 [68]    | 0               | -               | -            |
| <i>Clostridium perfringens</i>            | -         | -               | 1 [54]          | 0            |
| <i>Clostridium ramosum</i>                | -         | -               | 1 [70]          | 0            |
| <i>Dialister invisius</i>                 | -         | -               | 0               | 1 [52]       |
| <i>Erysipelotrichaceae incertae sedis</i> | 1 [57]    | 0               | -               | -            |
| <i>Erwinia dispersa</i>                   | -         | -               | 1 [46]          | 0            |
| <i>Escherichia coli</i>                   | 1 [59]    | 1 [65]          | -               | -            |
| <i>Eubacterium coprostanoligenes</i>      | 0         | 1 [68]          | -               | -            |
| <i>Eubacterium eligens</i>                | -         | -               | 1 [56]          | 0            |
| <i>Eubacterium sulci</i>                  | -         | -               | 0               | 1 [52]       |
| <i>Eubacterium ventriosum</i>             | -         | -               | 1 [56]          | 0            |
| <i>Faecalibacterium prausnitzii</i>       | 1 [59]    | 0               | 3 [39,46,60]    | 0            |
| <i>Fusobacterium nucleatum</i>            | 0         | 2 [65,68]       | 0               | 3 [37,43,56] |
| <i>Fusobacterium periodonticum</i>        | -         | -               | 0               | 1 [52]       |
| <i>Gemella haemolysans</i>                | 0         | 1 [65]          | -               | -            |
| <i>Gemella morbillorum</i>                | 0         | 1 [68]          | 0               | 2 [43,52]    |
| <i>Haemophilus parainfluenzae</i>         | 2 [65,68] | 0               | -               | -            |
| <i>Intestinimonas butyriciproducens</i>   | 0         | 1 [68]          | -               | -            |
| <i>Kocuria palustris</i>                  | -         | -               | 1 [52]          | 0            |
| <i>Lachnoanaerobaculum orale</i>          | -         | -               | 0               | 1 [70]       |
| <i>Lachnospiracea incertae sedis</i>      | 1 [57]    | 0               | -               | -            |
| <i>Lachnoclostridium citroniae</i>        | -         | -               | 0               | 1 [52]       |
| <i>Lactobacillus brevis</i>               | -         | -               | 1 [70]          | 0            |
| <i>Lactobacillus delbrueckii</i>          | 1 [35]    | 0               | -               | -            |
| <i>Leuconostoc gelidum</i>                | -         | -               | 0               | 1 [52]       |
| <i>Methylobacterium adhaesivum</i>        | -         | -               | 0               | 1 [70]       |
| <i>Parabacteroides distasonis</i>         | -         | -               | 2 [46,70]       | 0            |
| <i>Parabacteroides merdae</i>             | -         | -               | 0               | 1 [52]       |
| <i>Parvimonas micra</i>                   | 0         | 1 [68]          | 0               | 2 [43,52]    |
| <i>Peptostreptococcus micros</i>          | 0         | 1 [35]          | -               | -            |
| <i>Peptostreptococcus stomatis</i>        | 0         | 1 [68]          | 0               | 1 [43]       |
| <i>Porphyromonas endodontalis</i>         | 0         | 1 [59]          | -               | -            |
| <i>Prevotella copri</i>                   | 1 [36]    | 0               | 1 [46]          | 0            |
| <i>Prevotella intermedia</i>              | 0         | 1 [59]          | -               | -            |
| <i>Prevotella stercorea</i>               | 1 [36]    | 0               | -               | -            |

|                                  |        |        |           |        |
|----------------------------------|--------|--------|-----------|--------|
| <i>Pseudomonas veroni</i>        | 1 [59] | 0      | 2 [59,70] | 0      |
| <i>Psychrobacter sanguinis</i>   | -      | -      | 1 [70]    | 0      |
| <i>Ralstonia mannitolilytica</i> | -      | -      | 1 [52]    | 0      |
| <i>Ruminococcus bromii</i>       | 0      | 1 [68] | 1 [70]    | 0      |
| <i>Ruminococcus callidus</i>     | 0      | 1 [68] | -         | -      |
| <i>Ruminococcus torques</i>      | 1 [65] | 0      | -         | -      |
| <i>Shewanella algae</i>          | -      | -      | 0         | 1 [70] |
| <i>Solobacterium moorei</i>      | 0      | 1 [68] | -         | -      |
| <i>Streptococcus bovis</i>       | -      | -      | 0         | 1 [52] |
| <i>Streptococcus intermedius</i> | 0      | 1 [65] | -         | -      |
| <i>Streptococcus salivarius</i>  | -      | -      | 0         | 1 [56] |
| <i>Vibrio cholerae</i>           | 1 [59] | 0      | -         | 0      |

---

Abbreviations: CRC: colorectal cancer; HC: healthy controls; NCT: non-cancerous tissue.

**Supplementary Table S6. Qualitative synthesis showing the strong and the suggestive microbial taxonomic associations with CRC.**

|               | Microbial taxa              | CRC vs HC<br>N (%) studies | CRC vs NCT<br>N (%) studies |
|---------------|-----------------------------|----------------------------|-----------------------------|
| <b>Phylum</b> | Actinobacteria              | 2 (20%)                    | 4 (14%)                     |
|               | Bacteroidetes               |                            | 5 (17%)                     |
|               | Cyanobacteria               |                            | 2 (7%)                      |
|               | Fusobacteria                | 4 (40%)                    | 8 (28%)                     |
| <b>Class</b>  | Alphaproteobacteria         | 2 (20%)                    |                             |
|               | Bacilli                     |                            | 2 (7%)                      |
|               | Bacteroidia                 |                            | 2 (7%)                      |
| <b>Order</b>  | Bacteroidales               |                            | 2 (7%)                      |
|               | Bifidobacteriales           |                            | 2 (7%)                      |
|               | Burkholderiales             |                            | 2 (7%)                      |
|               | Campylobacteriales          |                            | 2 (7%)                      |
|               | Clostridiales               | 2 (20%)                    | 2 (7%)                      |
|               | Fusobacteriales             |                            | 2 (7%)                      |
| <b>Family</b> | <i>Bifidobacteriaceae</i>   |                            | 2 (7%)                      |
|               | <i>Campylobacteriaceae</i>  |                            | 2 (7%)                      |
|               | <i>Fusobacteriaceae</i>     |                            | 3 (10%)                     |
|               | <i>Gemellaceae</i>          |                            | 2 (7%)                      |
|               | <i>Muribaculaceae</i>       |                            | 2 (7%)                      |
|               | <i>Porphyromonadaceae</i>   |                            | 4 (14%)                     |
|               | <i>Rikenellaceae</i>        |                            | 4 (14%)                     |
|               | <i>Ruminococcaceae</i>      |                            | 7 (24%)                     |
|               | <i>Streptococcaceae</i>     |                            | 2 (7%)                      |
| <b>Genus</b>  | <i>Acinetobacter</i>        | 2 (20%)                    | 3 (10%)                     |
|               | <i>Akkermansia</i>          |                            | 3 (10%)                     |
|               | <i>Bacillus</i>             |                            | 3 (10%)                     |
|               | <i>Bifidobacterium</i>      |                            | 3 (10%)                     |
|               | <i>Blautia</i>              | 3 (25%)                    | 4 (14%)                     |
|               | <i>Bradyrhizobium</i>       |                            | 2 (7%)                      |
|               | <i>Brevundimonas</i>        | 2 (20%)                    |                             |
|               | <i>Campylobacter</i>        | 4 (40%)                    | 9 (31%)                     |
|               | <i>Collinsella</i>          |                            | 3 (10%)                     |
|               | <i>Dehalobacterium</i>      | 2 (20%)                    |                             |
|               | <i>Eikenella</i>            |                            | 2 (7%)                      |
|               | <i>Escherichia-Shigella</i> | 2 (20%)                    |                             |
|               | <i>Faecalibacterium</i>     | 2 (20%)                    | 5 (17%)                     |
|               | <i>Fusobacterium</i>        | 6 (60%)                    | 19 (66%)                    |
|               | <i>Gemella</i>              |                            | 3 (10%)                     |
|               | <i>Granulicatella</i>       | 3 (30%)                    | 3 (10%)                     |
|               | <i>Klebsiella</i>           | 3 (30%)                    |                             |
|               | <i>Lachnoanaerobaculum</i>  |                            | 2 (7%)                      |
|               | <i>Megasphaera</i>          |                            | 2 (7%)                      |
|               | <i>Methylobacterium</i>     |                            | 2 (7%)                      |
|               | <i>Neisseria</i>            | 2 (20%)                    |                             |
|               | <i>Oscillibacter</i>        |                            | 2 (7%)                      |
|               | <i>Oscillospira</i>         | 2 (20%)                    |                             |
|               | <i>Parabacteroides</i>      |                            | 9 (31%)                     |
|               | <i>Paraprevotella</i>       |                            | 2 (7%)                      |
|               | <i>Parvimonas</i>           | 4 (40%)                    | 8 (28%)                     |
|               | <i>Pedobacter</i>           | 2 (20%)                    |                             |
|               | <i>Peptostreptococcus</i>   | 5 (50%)                    | 6 (21%)                     |
|               | <i>Porphyromonas</i>        | 2 (20%)                    |                             |

|                |                                     |         |         |
|----------------|-------------------------------------|---------|---------|
|                | <i>Propionibacterium</i>            | 3 (30%) |         |
|                | <i>Pseudomonas</i>                  |         | 5 (17%) |
|                | <i>Ruminococcus</i>                 |         | 6 (21%) |
|                | <i>Schwartzia</i>                   | 2 (20%) |         |
|                | <i>Selenomonas</i>                  | 2 (20%) | 4 (14%) |
|                | <i>Shewanella</i>                   |         | 2 (7%)  |
|                | <i>Sphingomonas</i>                 | 2 (20%) | 2 (7%)  |
|                | <i>Stenotrophomonas</i>             | 2 (20%) |         |
|                | <i>Streptococcus</i>                | 3 (30%) | 7 (24%) |
|                | <i>Veillonella</i>                  |         | 2 (7%)  |
| <b>Species</b> | <i>Bacteroides fragilis</i>         | 4 (40%) | 3 (10%) |
|                | <i>Faecalibacterium prausnitzii</i> |         | 3 (10%) |
|                | <i>Fusobacterium nucleatum</i>      | 2 (20%) | 3 (10%) |
|                | <i>Gemella morbillorum</i>          |         | 2 (7%)  |
|                | <i>Haemophilus parainfluenzae</i>   | 2 (20%) |         |
|                | <i>Parabacteroides distasonis</i>   |         | 2 (7%)  |
|                | <i>Parvimonas micra</i>             |         | 2 (7%)  |
|                | <i>Pseudomonas veroni</i>           |         | 2 (7%)  |

|  |                                                                                            |
|--|--------------------------------------------------------------------------------------------|
|  | Strong positive association (≥3 studies in same direction; none in opposite direction);    |
|  | Suggestive positive association (2 studies in same direction; none in opposite direction); |
|  | Strong negative association (≥3 studies in same direction; none in opposite direction);    |
|  | Suggestive negative association (2 studies in same direction; none in opposite direction). |
